# Supplementary material for: A divergent approach for the synthesis of (hydroxymethyl)furfural (HMF) from spent aromatic biomass-derived (chloromethyl)furfural (CMF) as a renewable feedstock
Source: Royal Society of Chemistry journal article supplement (doi:10.1039/d0ra09310f), 2020-01-01
Supplement: d0ra09310f1.pdf [file d0ra09310f1.pdf]

## A divergent approach for synthesis of (hydroxymethyl)furfural (HMF) from spent aromatic biomass derived (chloromethyl)furfural (CMF) as a renewable feed stock

Mangat Singh,<sup>a,b</sup> Nishant Pandey,<sup>a,b</sup> Bhuwan B. Mishra<sup>a\*</sup>

<sup>a</sup>Center of Innovative and Applied Bioprocessing (CIAB), Sector 81 (Knowledge City), S.A.S. Nagar, Mohali-140306, Punjab, India

<sup>b</sup>Department of Chemistry, Faculty of Science, Panjab University, Chandigarh-160014, India

---

### Table of Contents

|     |                                                                                                                                            |    |
|-----|--------------------------------------------------------------------------------------------------------------------------------------------|----|
| 1.  | <b>Figure S1.</b> HPLC chromatogram of hydrolysate obtained <i>via</i> processing of pre-treated biomass with conc. HCl at 100 °C          | 2  |
| 2.  | <b>Figure S2.</b> HPLC chromatogram of hydrolysate obtained <i>via</i> processing of pre-treated biomass with conc. HCl and NaCl at 100 °C | 3  |
| 3.  | <b>Figure S3.</b> GC chromatogram of CMF                                                                                                   | 4  |
| 4.  | <b>Figure S4.</b> Mass spectrum of CMF                                                                                                     | 5  |
| 5.  | <b>Figure S5.</b> <sup>1</sup> H NMR spectrum of CMF                                                                                       | 6  |
| 6.  | <b>Figure S6.</b> <sup>13</sup> C NMR spectrum of CMF                                                                                      | 7  |
| 7.  | <b>Figure S7.</b> FT-IR of standard (S-LIN) and isolated lignin (SB-LIN)                                                                   | 8  |
| 8.  | <b>Figure S8.</b> XRD analysis of isolated lignin                                                                                          | 9  |
| 9.  | <b>Figure S9.</b> Elemental composition of isolated lignin by EDS analysis lignin                                                          | 10 |
| 10. | <b>Figure S10.</b> GC chromatogram of HMF                                                                                                  | 11 |
| 11. | <b>Figure S11.</b> Mass spectrum of HMF                                                                                                    | 12 |

Number of pages: 12

Number of figures: 11

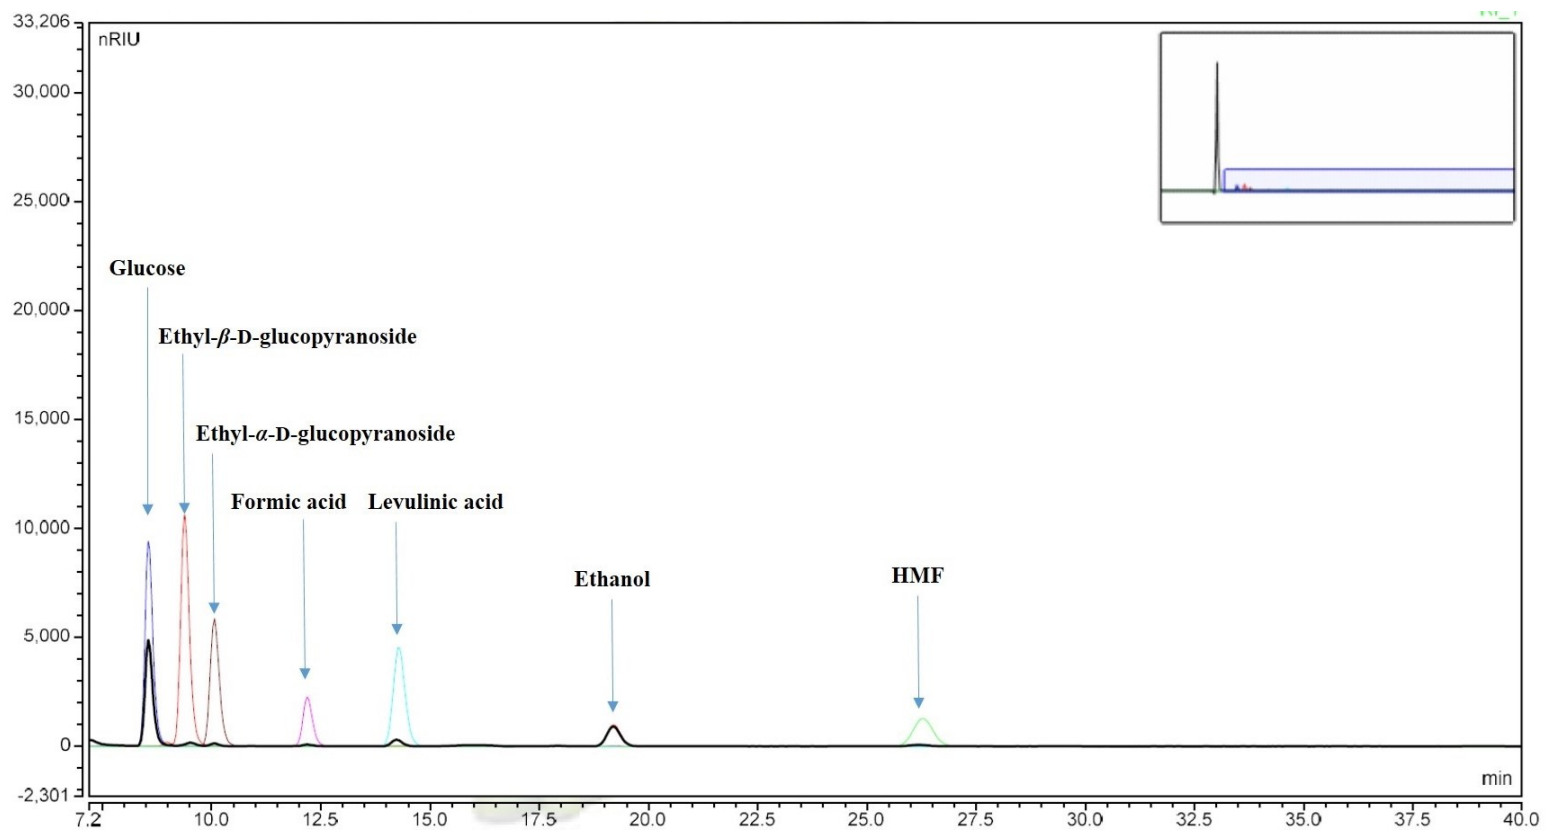

**Figure S1.** HPLC chromatogram of hydrolysate obtained *via* processing of pre-treated biomass with conc. HCl at 100 °C

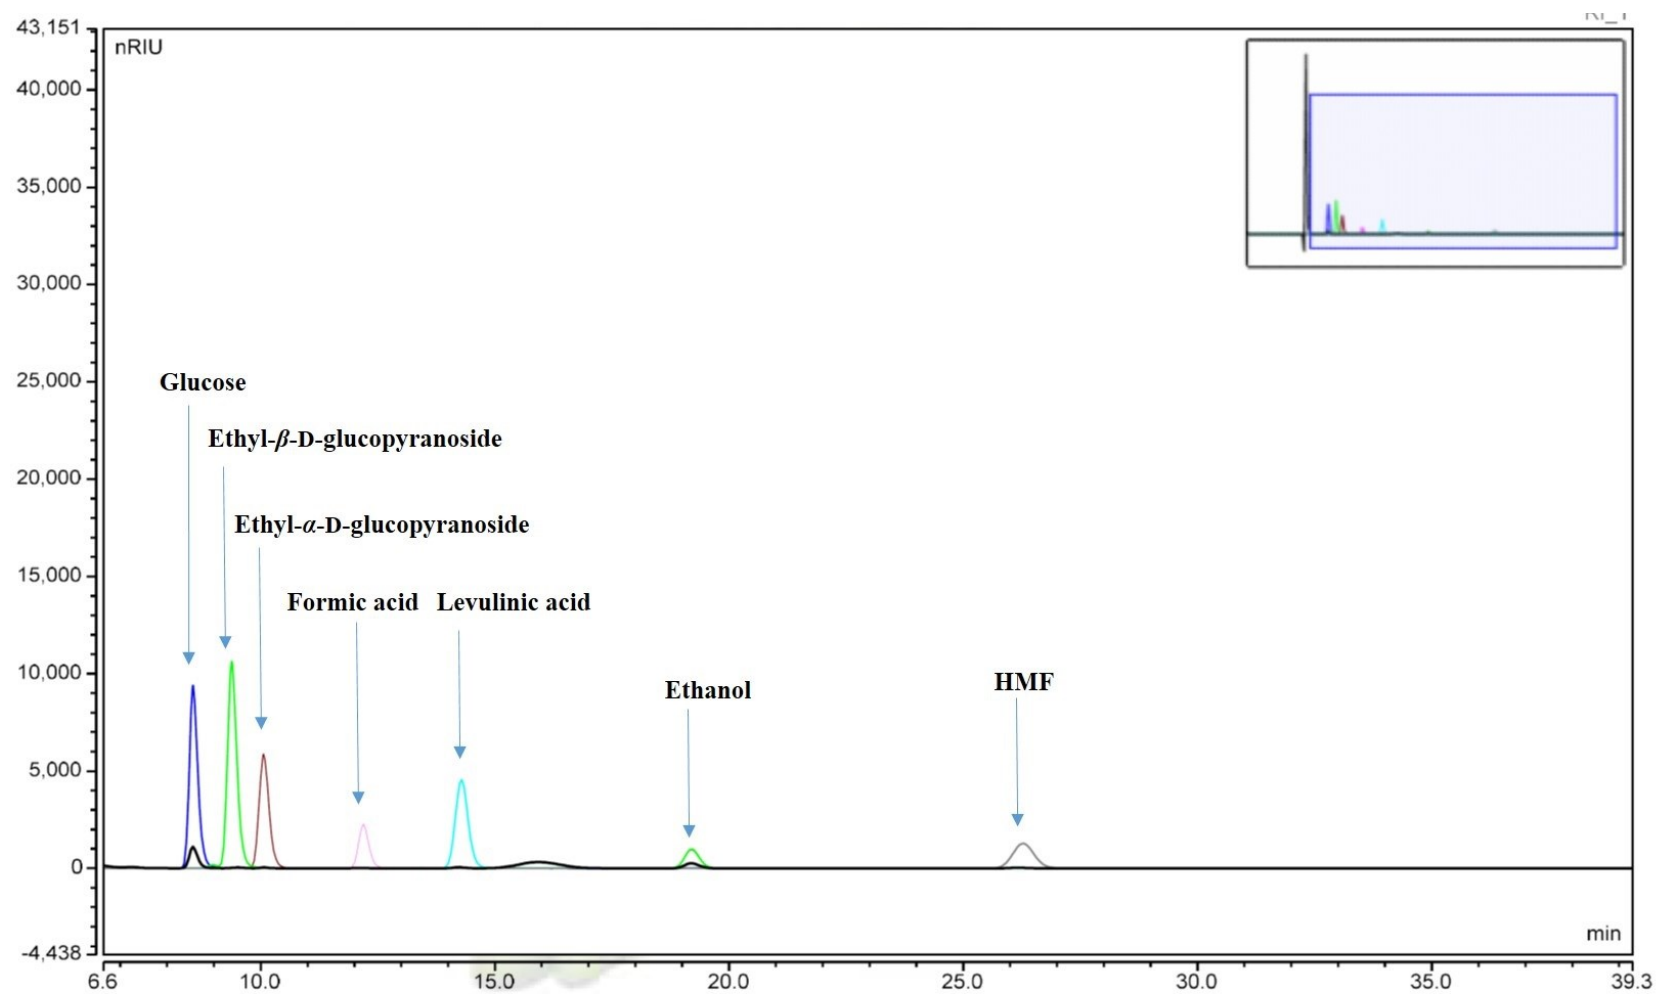

**Figure S2.** HPLC chromatogram of hydrolysate obtained *via* processing of pre-treated biomass with conc. HCl and NaCl at 100 °C

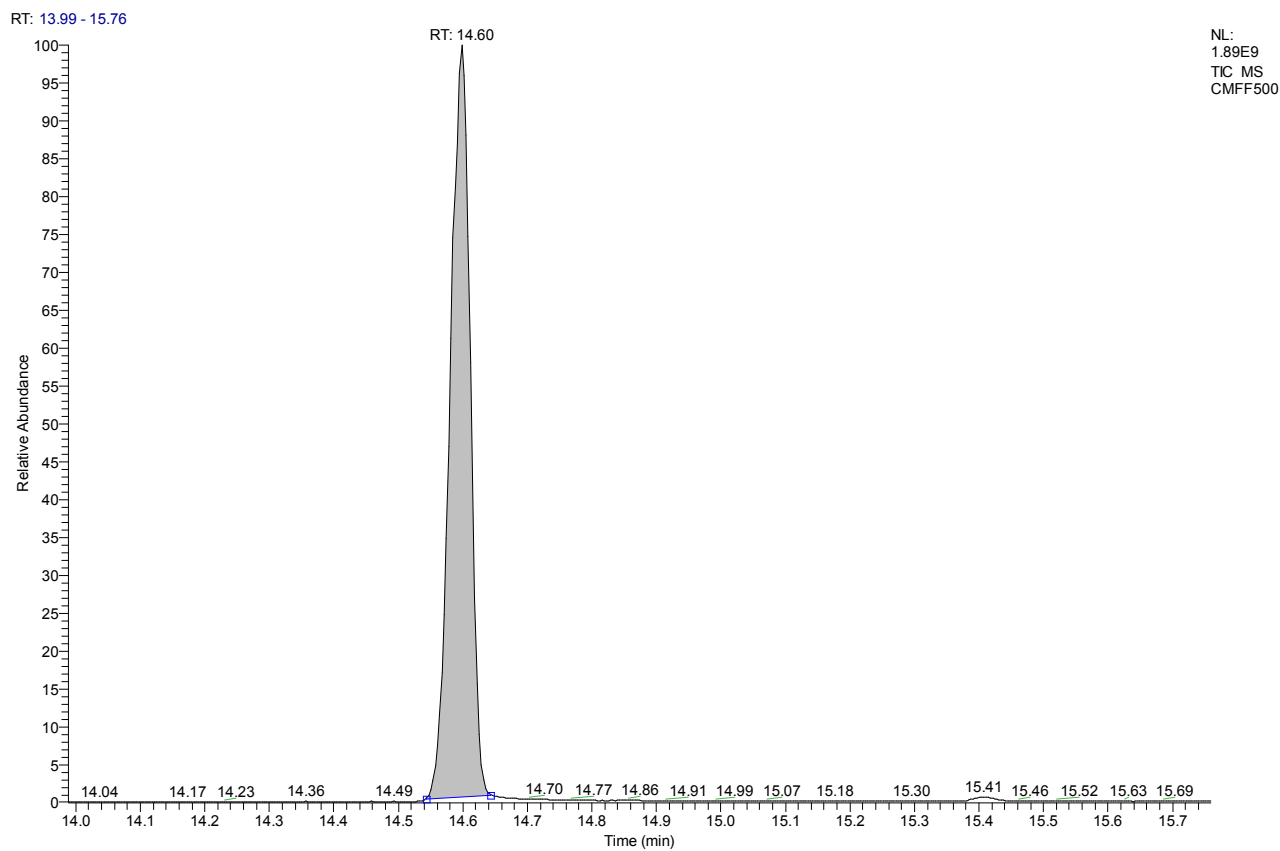

Figure S3. GC chromatogram of CMF

CMFF500 #2809 RT: 14.55 AV: 1 NL: 1.25E7  
T: {0,0} + c EI Full ms [50.00-400.00]

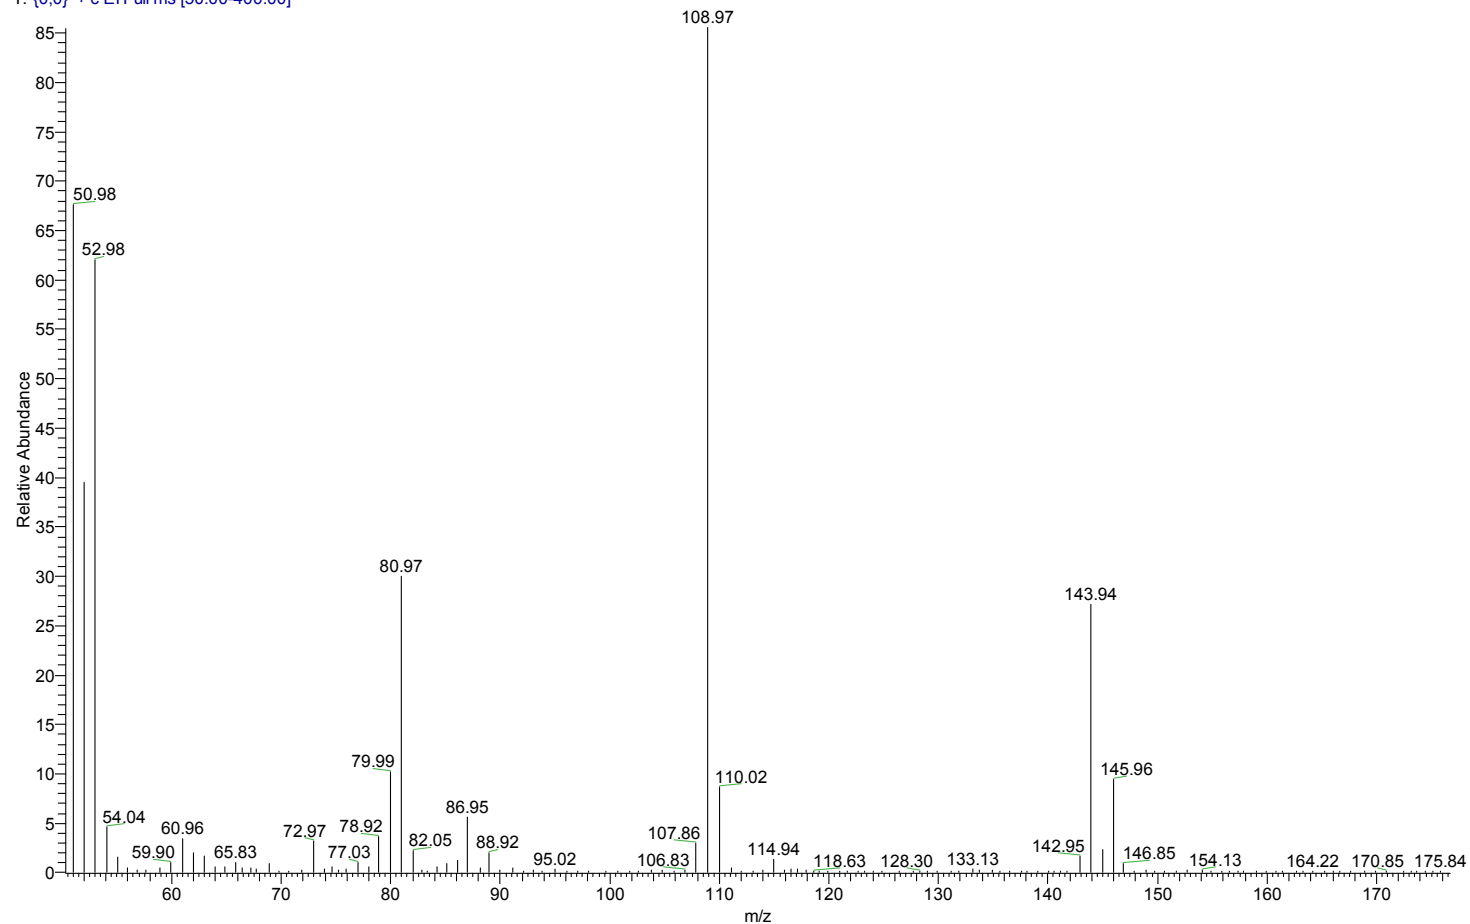

Figure S4. Mass spectrum of CMF

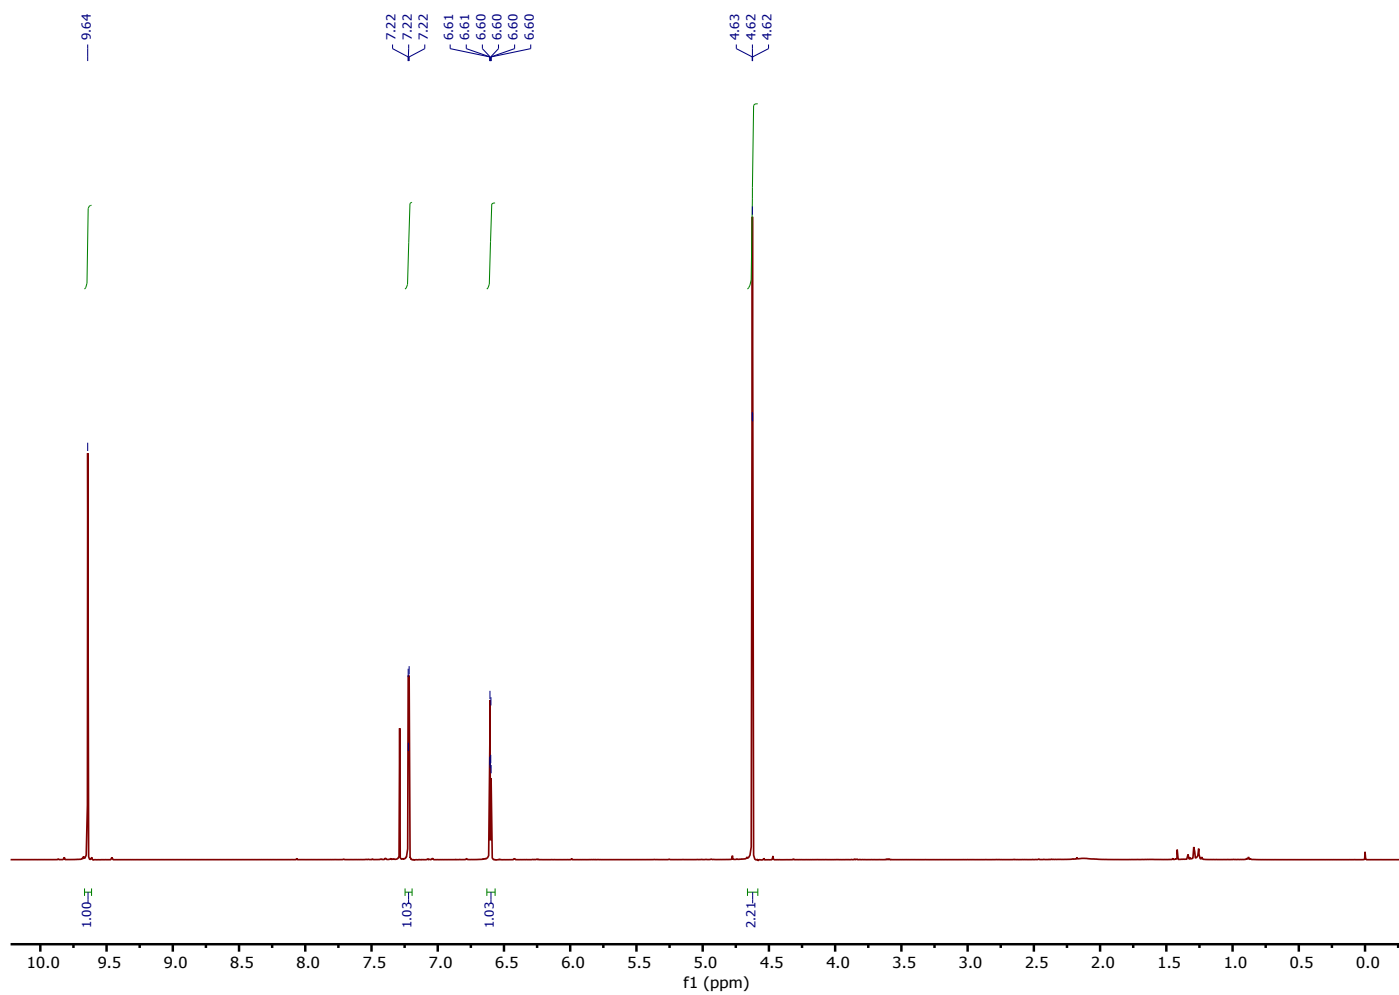

**Figure S5.**  $^1\text{H}$  NMR spectrum of CMF

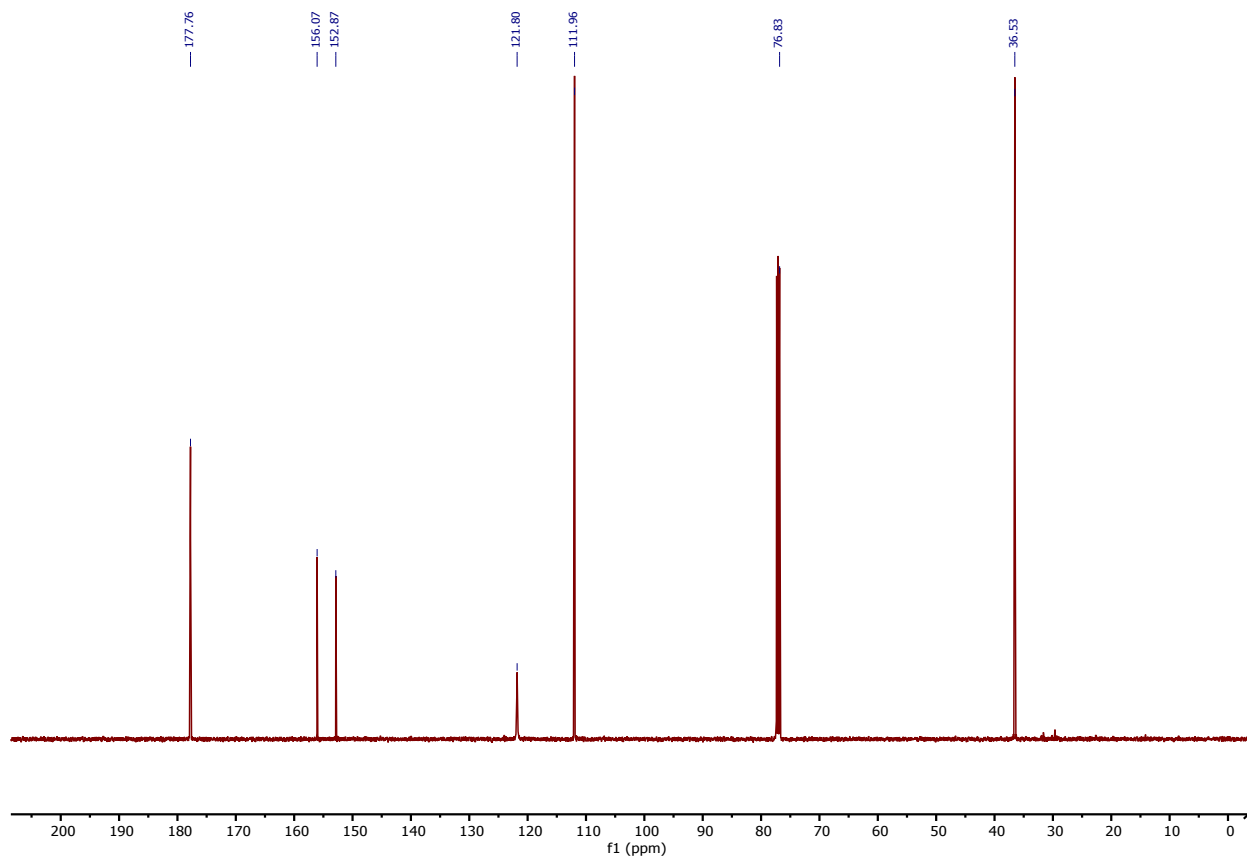

**Figure S6.** <sup>13</sup>C NMR spectrum of CMF

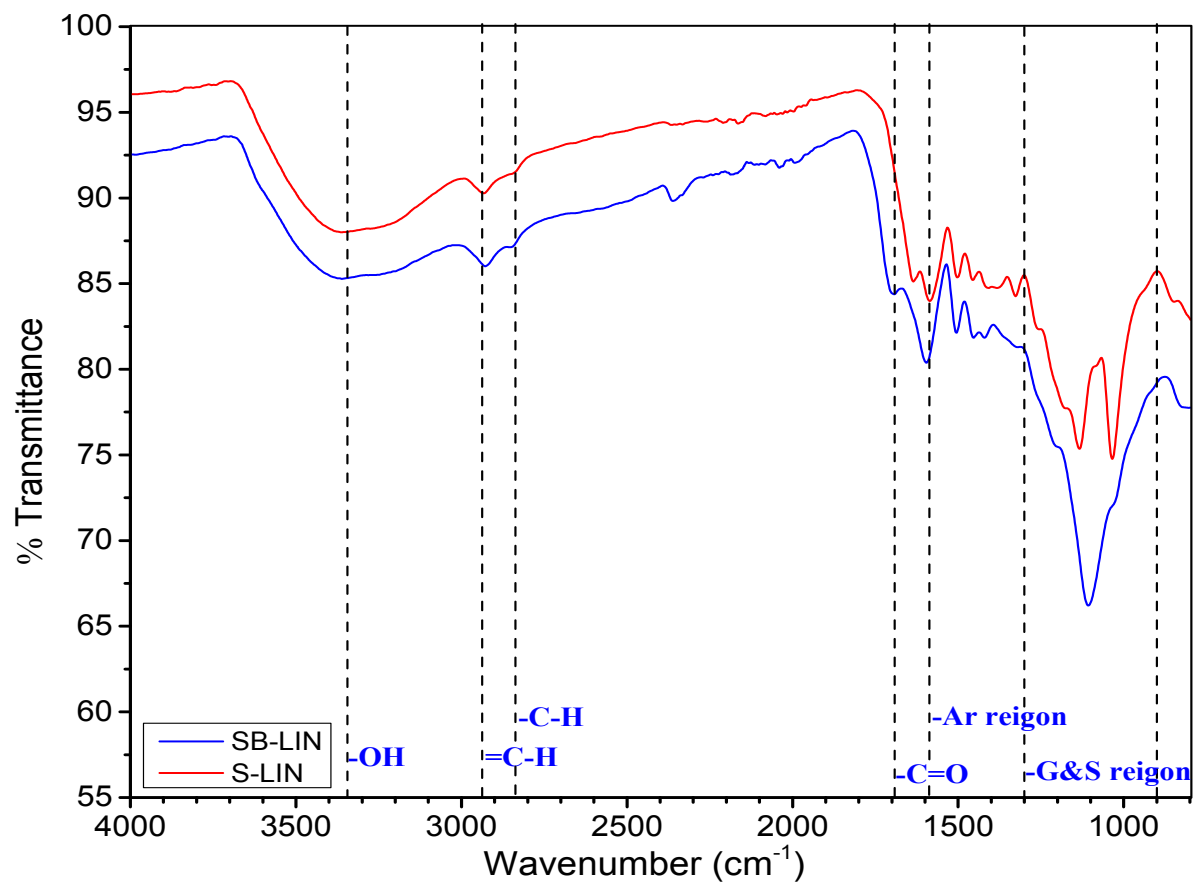

**Figure S7.** FT-IR of standard (S-LIN) and isolated lignin (SB-LIN)



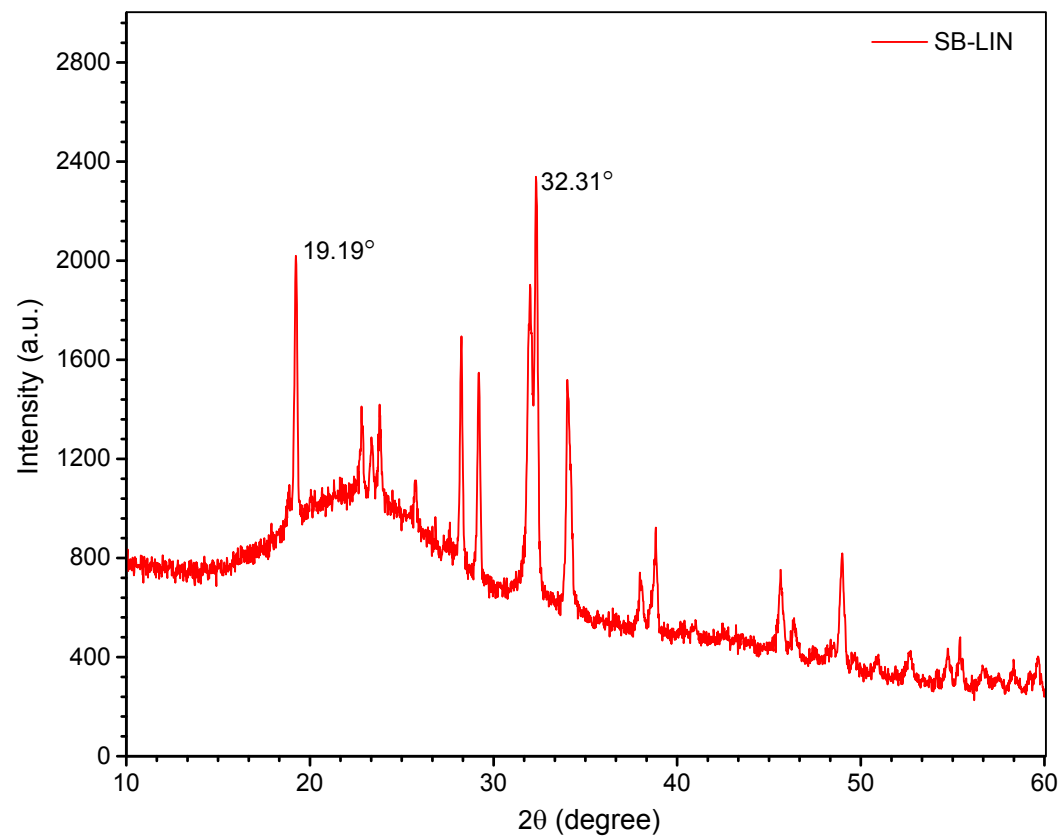

**Figure S8.** XRD analysis of isolated lignin

## Application Note

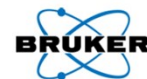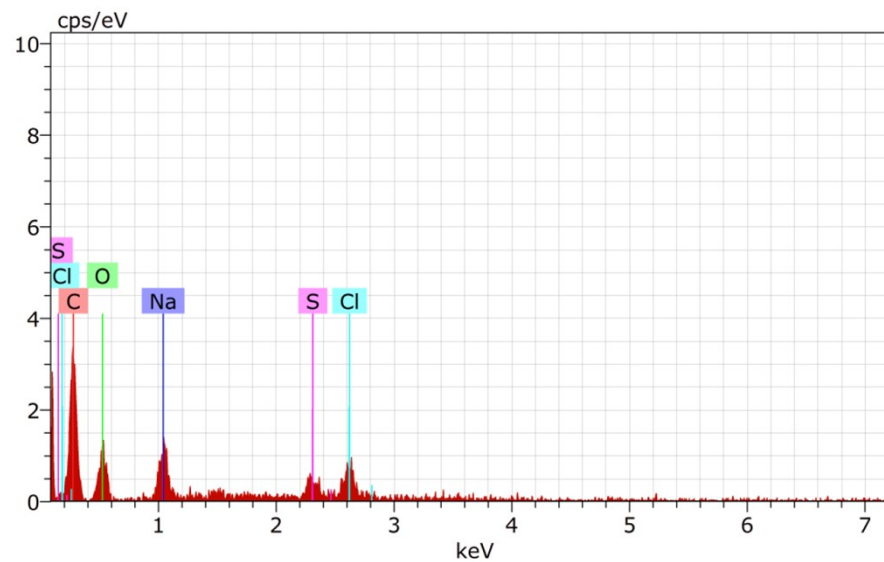

Spectrum: test 6397

| Element  | Series   | unn. C<br>[wt.%] | norm. C<br>[wt.%] | Atom. C<br>[at.%] | Error (3 Sigma)<br>[wt.%] |
|----------|----------|------------------|-------------------|-------------------|---------------------------|
| Carbon   | K-series | 36.08            | 61.46             | 71.33             | 24.24                     |
| Oxygen   | K-series | 14.78            | 25.18             | 21.94             | 13.62                     |
| Sodium   | K-series | 3.78             | 6.45              | 3.91              | 1.14                      |
| Chlorine | K-series | 2.67             | 4.55              | 1.79              | 0.63                      |
| Sulfur   | K-series | 1.39             | 2.37              | 1.03              | 0.43                      |
| Total:   |          | 58.70            | 100.00            | 100.00            |                           |

**Figure S9.** Elemental composition of isolated lignin by EDS analysis lignin

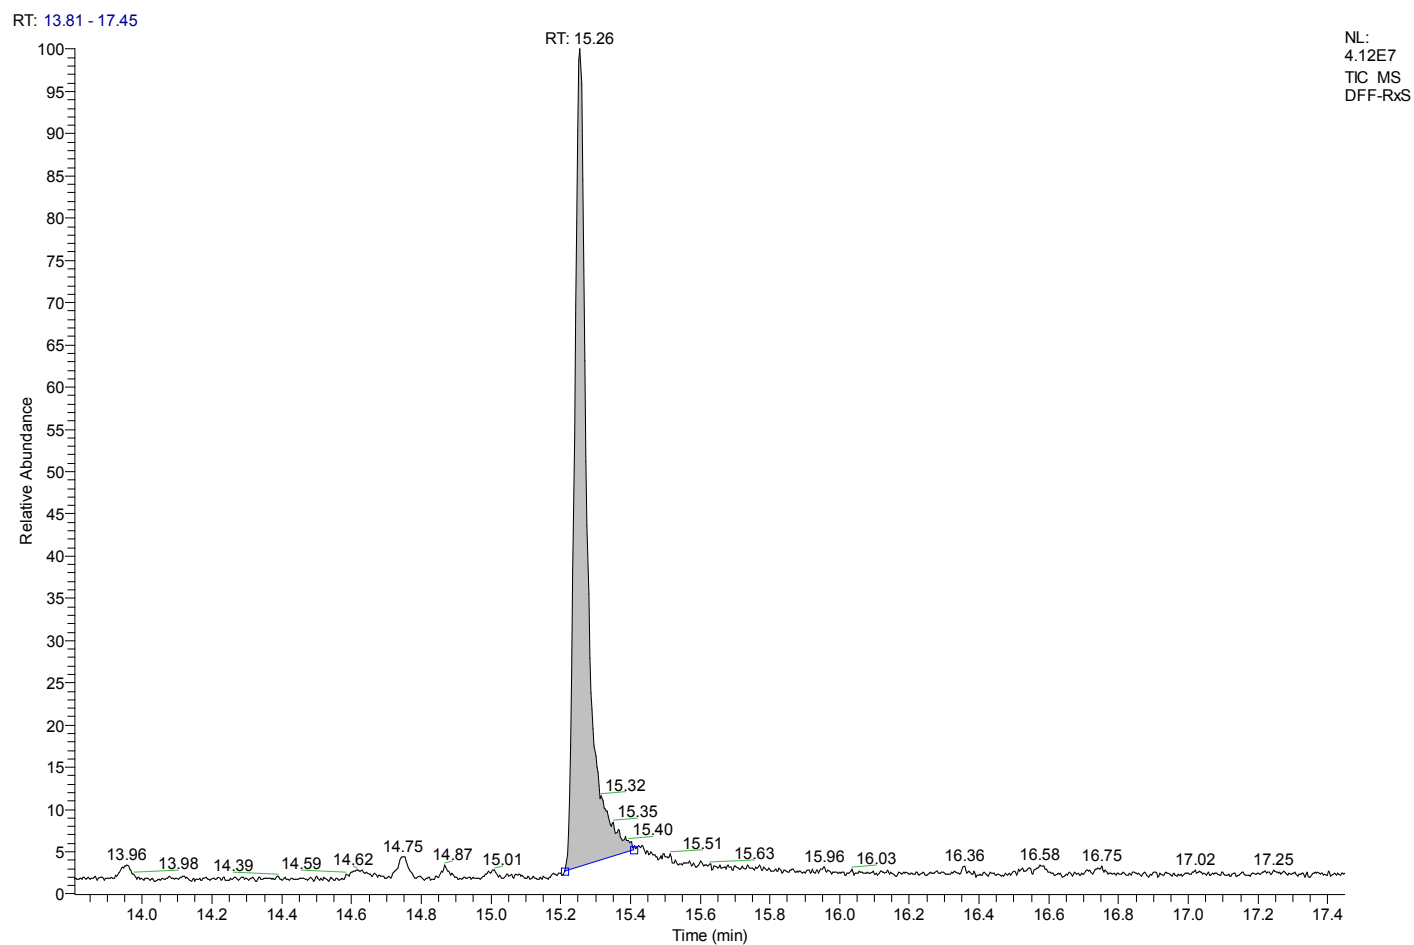

Figure S10. GC chromatogram of HMF

DFF-RxS #3015 RT: 15.25 AV: 1 NL: 1.05E7  
T: {0,0} + c EI Full ms [50.00-400.00]

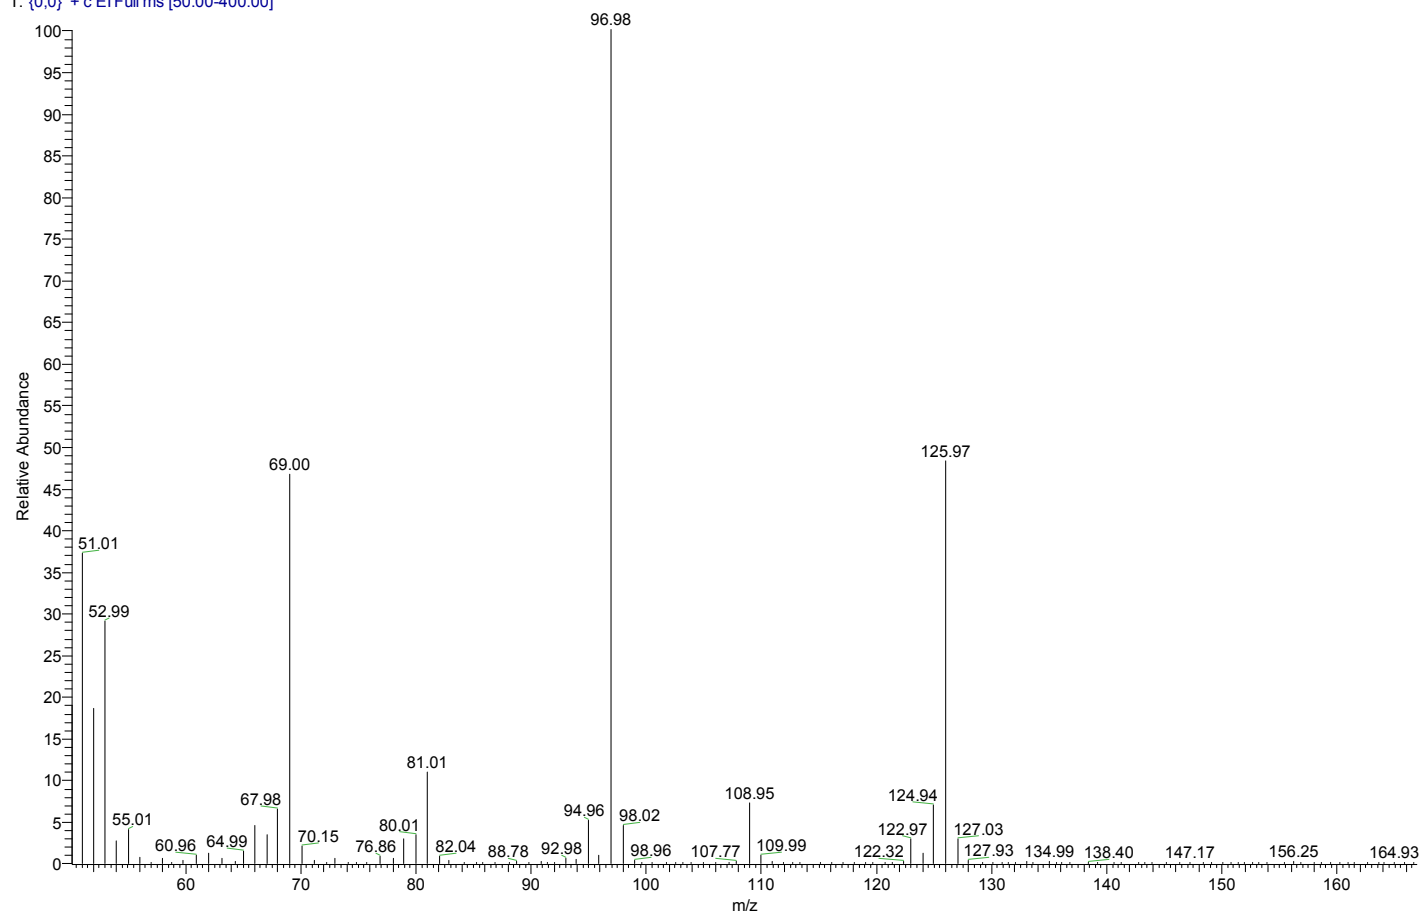

Figure S11. Mass spectrum of HMF
